1           **Valuing Carbon Stocks across a Tropical Lagoon after**  
2           **Accounting for Black and Inorganic Carbon: Bulk Density**  
3           **Proxies for monitoring**

4   **John Barry Gallagher\*<sup>‡</sup>, Swee-Theng Chew<sup>†</sup>, John Madin<sup>†</sup>, Anitra Thorhaug<sup>§</sup>**

5           <sup>‡</sup>**Institute for Marine and Antarctic Studies (IMAS), University of Tasmania,**  
6           **Hobart 7000**

7           <sup>†</sup>**Borneo Marine Research Institute (BMRI), Universiti Malaysia Sabah, Jalan UMS,**  
8           **88400 Kota Kinabalu, Sabah, Malaysia.**

9           <sup>§</sup>**School of Forestry & Environmental Sciences, Yale University, New Haven, CT**

10           **\*Correspondence: johnbarrygallagher@icloud.com**

11   **LRH Gallagher *et al.***

12   **RRH Seagrass & mangrove blue, black and carbonate stocks**

13

## ABSTRACT

14 Managing seagrass and mangrove can be enhanced through carbon valued payment  
15 incentives schemes. Success will depend on the accuracy and extent of the carbon stock  
16 mitigation and accessible methods of monitoring and marking changes. In a relatively  
17 closed socioecological Southeast Asian lagoon we estimated the value of total organic  
18 carbon stocks (TOC) of both seagrass and mangroves. Mitigation corrections were also  
19 made for black carbon (BC) and calcareous inorganic carbon equivalents ( $PIC_{equiv}$ ), and  
20 their sediment dry bulk density (DBD) tested as a cost effective means of both estimating  
21 those stock concepts and possible impacts outside their parameter confidence intervals.  
22 Overall, seagrass and mangroves TOC densities across the lower lagoon ranged from  
23  $15.3 \pm 4.3$  and  $124.3 \pm 21.1$  Mg C ha<sup>-1</sup> respectively,  $175.2 \pm 46.9$  and  $103.2 \pm 19.0$  Mg C ha<sup>-1</sup>  
24 for seagrass and  $355.0 \pm 24.8$  and  $350.3 \pm 35.2$  Mg C ha<sup>-1</sup>) for mangroves across the two  
25 upper lagoon branches. Only mangrove biomass made significant additional  
26 contributions ranging from  $178.5 \pm 62.3$  to  $120.7 \pm 94.8$  Mg C ha<sup>-1</sup> for lower and upper  
27 regions respectively. The difference between the lagoons total seagrass and mangroves  
28 TOC stocks ( $5.98 \pm 0.69$  and  $390 \pm 33.22$  GgC respectively) was further amplified by the  
29 lagoons' larger mangrove area. When corrected for BC and  $PIC_{equiv}$ , the carbon stock  
30 mitigation was only reduced by a moderate 14.2%. Across the lagoon the sedimentary  
31 DBD showed strong ( $R^2 = 0.85$ ,  $P < 0.001$ ) to moderate ( $R^2 = 0.67$ ,  $P < 0.001$ ) linear  
32 correlations with seagrass and mangrove [TOC] respectively, moderate correlations with  
33 seagrass [PIC] ( $R^2 = 0.6$ ,  $P < 0.001$ ), but an invariant and relatively constant response to  
34 mangrove [PIC] ( $2.7 \text{ kg m}^{-3} \pm 0.07$ ). Valuations as CO<sub>2</sub>e was worth on average 0.44  
35 million US\$ y<sup>-1</sup> over 20 years; less than the total income of the indigenous users as

36 potential custodians (1.8 and 7.4 million US\$  $y^{-1}$ ). Implications of this valuation was  
37 discussed.

38 **ADDITIONAL INDEX WORDS:** *Blue carbon, Mangrove, seagrass, Salut-*  
39 *Mengkabong, Sama-Bajau*

## 40 INTRODUCTION

41 Coastal vegetated or blue carbon ecosystems of mangroves, salt marshes, seagrasses and  
42 seaweeds, support a range of ecosystem services that benefit both local users, and  
43 collectively can mitigate global greenhouse gas emissions (Nellemann, Corcoran *et al.*  
44 2009). Measuring the suit of these natural capital services does not easily fit within  
45 traditional economic models of supply and demand of tangible goods and services  
46 (Costanza, de Groot *et al.* 2014). The advent greenhouse gas emissions, however, has led  
47 to the emergence of blue carbon mitigation investment schemes. These schemes do fit  
48 comfortably within a frame work of supply and demand of tangible goods (i.e., carbon  
49 stocks) and services (i.e., mitigation of greenhouse gases) (Hejnowicz, Kennedy *et al.*  
50 2015; Pendleton, Donato *et al.* 2012). The tenet behind such schemes is to value the cost  
51 of damage to the global environment from the loss and disturbance of ecosystem carbon  
52 sinks. This is achieved through a generic form of carbon cap and trade on the open  
53 market. The cap on user carbon emissions is set by the policy within the economic region.  
54 Users that emit more than their cap can do so by purchasing carbon credits to the  
55 custodians and managers of those ecosystems as a payment scheme for this ecosystem  
56 service (PES). The value of credits is then ultimately determined by capacity of the  
57 ecosystem persistence to mitigate any further greenhouse emissions, at a price set by the  
58 market competition (Repetto 2013). The schemes thus provide both incentives for users

59 to monitor and protect these ecosystems as well as for traders to reduce their payments  
60 and emissions below the cap. No more is this important than for coastal communities  
61 within SE Asia. Such communities have a stake in maintaining the integrity of seagrass  
62 and mangroves as their major supply of food, building materials, cooking fuel and  
63 disposable income (Raduan, Ariff *et al.* 2010). Clearly, PES requires good estimates for  
64 carbon biomass and sedimentary contents that statistically representative sampling can  
65 provide.

### 66 **Extent of the carbon stocks**

67 While measurements of carbon within biomass and sediments can be relatively  
68 straightforward, questions have been raised on how stock preservation is assessed as a  
69 mitigating service in further release of the dominant greenhouse CO<sub>2</sub> from the marine  
70 environment. That is, questions of the extent of loss after disturbance, how much is  
71 remineralised over climatic scales, whether to include the presence sedimentary  
72 allochthonous organic recalcitrants and particulate inorganic carbon (PIC) as an arbiter of  
73 carbon stock mitigation services (Chew and Gallagher 2018; Gallagher 2017). For woody  
74 biomass, in particular, how much is released as CO<sub>2</sub> could vary with its use, should it be  
75 disturbed or harvested (Eong, 1993). For sediments the depth disturbance and fate of the  
76 sedimentary carbon stock will depend on the nature of the disturbance as a replacement  
77 ecosystem or land use (Siikamäki, Sanchirico *et al.* 2013)

78 The potential loss of seagrass biomass stock to remineralisation can be arguably linked  
79 to similar fate as its advected litter deposits, when we consider its utility as commercial  
80 product as limited. How much is reburied (Sophia and Robie 2016) and sequestered to  
81 the deep ocean is uncertain (Duarte and Krause-Jensen 2017; Gallagher 2015). This is in

82 contrast the fate of mangrove biomass, where uncertainty is housed in assessing to  
83 estimate the fraction mineralised in the production and use charcoal over the amount  
84 stabilized as building materials and artesian products (Eong 1993).

85 For the sedimentary total organic carbon (TOC) stocks assessments must also be made  
86 of how much will be remineralised within climatic time scales. That will depend largely,  
87 not necessarily on the total depth of the sediment column, but the depth of disturbance  
88 and how much of the TOC over that depth is remineralised within climatic time scales  
89 (Pendleton, Donato *et al.* 2012; Siikamäki, Sanchirico *et al.* 2013). While, the condition  
90 ‘likely’ can be hedged (Gallagher 2017), it is ultimately unknowable. Consequently,  
91 IPCC (2014) have suggested allocation of precautionary limits on parameters of  
92 disturbance and remineralisation to move PES schemes forward. A likely depth of soil  
93 disturbance has been set to a maximum of 1 m, with remineralisation rate set at 96%.  
94 This scalar quantity is then given a vector characterization by averaging the loss to take  
95 20 years to reach equilibrium (IPCC 2014). Although its applicability to coastal marine  
96 systems has not been fully considered and maybe not appropriate (Järviö, Henriksson *et*  
97 *al.* 2018; Pendleton, Donato *et al.* 2012; Thorhaug, Poulos *et al.* 2017). Nevertheless, the  
98 IPCC disturbance parameters are useful to temper carbon stock over-estimates that could  
99 lead to perverse outcomes in allowing traders to emit more than the system can mitigate.

## 100 **Exclusion of types of organic and inorganic carbon**

101 Stable allochthonous organic forms, such pyrogenic black carbon do not require  
102 protection from mineralisation and thus, cannot be included in blue carbon ecosystem  
103 mitigation services (Chew and Gallagher 2018; Gallagher 2015; Gallagher, Chuan *et al.*  
104 2019a). The exclusion or inclusion of particulate calcareous inorganic carbon (PIC) is not

105 as clear. Disturbance of blue carbon sediments, the arbiter of how stock mitigation  
106 services are assessed, leads to carbonate oxidation and dissolution (Howard, Creed *et al.*  
107 2017; Ware, Smith *et al.* 1992). This results in an increase in dissolved inorganic carbon  
108 (DIC) considered as a long term atmospheric sink (Maher, Call *et al.* 2018) and can  
109 theoretically reduce the water columns  $p\text{CO}_2$  below atmospheric pressure. This is  
110 provided the exchange neighbouring waters are sufficiently alkaline and /or its exchange  
111 restricted. In relatively warm tropical/subtropical waters, however, it has also been  
112 observed that sediments vulnerable to disturbance may also lead to whitening events. These  
113 events are the expression of water column calcareous carbonate precipitation. The  
114 mechanism is under some debate. Events are either seeding from sedimentary particles in  
115 waters already saturated with calcium carbonate salts, and/or forced by the additional  
116 increases in pH and alkalinity (Broecker, Sanyal *et al.* 2000; Sondi and Juračić 2010).  
117 The first mechanism suggests an increase in the molar fraction (0.63) of  $p\text{CO}_2$  equivalent  
118 for the carbonate precipitated ( $\text{PIC}_{\text{equiv}}$ ). The coefficient of 0.63 is a chemical speciation  
119 distribution determined by the water body's alkalinity, pH, salinity, and the current  
120 atmospheric partial pressure (Ware, Smith *et al.* 1992). The second mechanism suggests  
121 that the additional carbon stock service provided by DIC from carbonate dissolution is  
122 constrained by re-precipitation. Until the science is convergent, we suggest that carbon  
123 stock assessments subtract  $\text{PIC}_{\text{equiv}}$ , along with BC, from the total carbon stock. In this  
124 way, perverse environmental outcomes may be avoided when traders have effectively  
125 been given permission to emit beyond the capacity of the ecosystems' carbon sink  
126 (Sophia and Robie 2016).

127 Once the carbon stock has been valued for trading, there is an obligation by the  
128 custodians to monitor this capital investment. While measuring biomass using its carbon

129 parameters are well understood, the carbon stock variability within sediments would  
130 benefit from a predictor accessible to the local citizenry. Relatively Sophisticated element  
131 analysis of content, and cheaper more accessible laboratory organic matter and carbonate  
132 content combustion methods (Santisteban, Mediavilla *et al.* 2004) are beyond the  
133 capacity of fisher communities. The possible exception, are motivated school programs  
134 (Martay and Pearce-Higgins 2018) that have access to basic laboratory equipment  
135 supported by trained teachers or experts in the field. A simple cost effective and  
136 accessible alternative is of course preferable. In this way, it can conceivably be used to  
137 monitor the region for the effects of local disturbance or upstream catchment  
138 developments, and continue to test the valuation by extending the assessment for areas  
139 not yet fully sampled. Dry bulk density (DBD  $\text{g dry mass cm}^3$ ) is one potential cost-  
140 effective measurement proxy for soil organic carbon. To date this has been limited to  
141 tropical peatlands (Warren, Kauffman *et al.* 2012), The authors found that DBD had an  
142 positive proportional response with peat soil organic carbon concentrations, but became  
143 increasingly unpredictably at high bulk densities equivalent to  $< 40\%$  organic carbon  
144 concentrations.

145 As far as we are aware DBD relationship with carbon concentrations has not been  
146 formally expressed across tropical seagrasses and mangroves or indeed empirical relation  
147 to PIC concentrations. Nor is it likely that DBD would respond in the same proportional  
148 manner to organic carbon concentrations, as unlike peatland sediments, the DBD is  
149 dominated by its organic components. Leaving aside the degree of water saturation in  
150 intertidal conditions, for seagrass and mangrove sediments the DBD is largely increases  
151 with and increasing sand content over the smaller silt and clay components and their  
152 characteristic organic matter contents and larger interstitial pore water volumes (Tolhurst,

153 Underwood *et al.* 2005). The mineral organic content is mostly associated with the  
154 smaller clay-silt fraction, the result of larger surface sorption area, and interestingly is  
155 invariant across differing soils and regions of the globe (Mayer 1994). Other  
156 contributions can come from the remaining mass and water content of the plant litter,  
157 along with any bioturbated channels or gas vacuoles (Tolhurst, Underwood *et al.* 2005).  
158 Consequently, unlike peat soils we should expect an inverse proportionality of DBD with  
159 organic carbon concentrations. The variance across the residuals then becomes a likely  
160 expression of differing net litter retention and possibly variance associated with surface  
161 bioturbation and vacuoles. Should the relationship of be useful for TOC concentrations,  
162 its established relationship with BC across the lagoon can be used to adjust the organic  
163 carbon fraction involved in mitigation services (Chew and Gallagher 2018; Gallagher,  
164 Chuan *et al.* 2019a).

165 For PIC, as far as we are aware however, no relationship with DBD has yet been  
166 tested or any suggested reason other than a useful and possibly lagoon specific empirical  
167 coincidence. Nevertheless, for the sake of rigor, it is postulated that PIC concentrations  
168 associated with epibiont production may be proportional to the density and size of the  
169 seagrasses' canopy (Perry and Beavington-Penney 2005). Furthermore, this is covariant  
170 with increases in species canopy size up the lagoon, and a falling DBD with increasing  
171 proportions of the slit-clay fraction. In other words, PIC concentrations across this lagoon  
172 could be expected to increase with falling DBD in some manner. For mangroves the  
173 dynamic with PIC concentrations are mainly associated with epibenthic production and in  
174 proportion to the supply of food as mangrove litter (Volker and Matthias 2002). At worst,  
175 it is postulated that the remaining components that control the changes in DBD, and litter  
176 supply from changes in canopy biomass across the lagoon would likely confound any



177 significantly relationship with PIC concentrations. At best, falls in biomass density with  
178 increasingly sandier and higher DBDs' across the lagoon are sufficiently large to reduce  
179 the influence of other confounding factors.

## 180 **Aims**

181 This study seeks to identify the variability, the total extent and PES annual monetary  
182 values of seagrass and mangrove TOC stocks from biomass and sediments across upper  
183 and lower regions of Salut–Mengkabong lagoon (Sabah, Malaysia). The values are then  
184 tested for future conceptual bias considerations by sequentially accounting for  
185 sedimentary BC and PIC<sub>equiv</sub>. Given BC can be methodological concept two divergent  
186 means of analysis were used to measure concentrations. Estimates of the PES values were  
187 then put into context. The total annual income generated by the indigenous fishers,  
188 current occupants of lagoon (Sama-Bajau), was adjusted to current rates, along the  
189 efficacy of the response of sedimentary TOC and PIC concentrations with DBD. In this  
190 way, the total value of the lagoons carbon stocks become a measure of potential for  
191 managerial incentives for custodians, and how it may be best applied.

## 192 **METHODS**

### 193 **Study Site**

194 This is a description of the Salut-Mengkabong lagoon, its general topography, climate,  
195 the type of coastal vegetated ecosystems, and population rural/urban character. Sampling  
196 techniques and storage are described along with determinant analysis, data processing,  
197 the sampling design and statistical methods used to assess carbon stocks concepts.

198 Salut-Mengkabong lagoon (6.101734°N, 116.153845°E), is a tropical tide-dominated  
199 system semi-rural region (Hogue *et al.*, 2010) situated several kilometers south of the

200 district of Tuaran (population ~100,000). The lagoon has two major branches, Salut and  
201 Mengkabong, served by a narrow but relative deep entrance (up to 6 m). Mangroves  
202 occupy its shoreline and its water body supports subtidal seagrass meadows along an  
203 ostensibly lower sandy and upper muddy sedimentary gradient (Figure 1). Development  
204 around the shoreline is moderate with some aquaculture ponds at the head of the Salut  
205 branch and inland of the north shore of the Mengkabong branch. Discussions with the  
206 appointed community head (2017) indicated that the lagoon supports 480 households of  
207 the Sama-Bajau community (unpublished data). Of the 480 households 96% of the  
208 community families were fishers that depend on the lagoons' mangrove and seagrass  
209 resources (Raduan *et al.*, 2010). While inputs of BC across the Southeast Asian region as  
210 a whole is substantial, it should be noted that Sabah lies only within the Penumbra of  
211 atmospheric smoke haze emanating from the distant Chinese mainland and seasonal  
212 Kalimantan peat fires (Permadi, Kim Oanh *et al.* 2018).

### 213 **Collection and transport of samples**

214 This is a description of the method and scale of collection, transport, storage of seagrass  
215 and mangrove sediments, and means by which biomass was measured and calculated.

216 For seagrass, sediment cores around 25 cm long were extracted with a 5 cm diameter  
217 PVC tube ( $n = 56$ ) at each station across all of the lagoons seagrass meadows (Figure 1).  
218 On extraction, the cores were then immediately placed under ice in a vertical position  
219 before being transported to the laboratory and stored at -20°C after sampling for dry bulk  
220 density and sediment particle size. Coverage was averaged from two quadrats (50 x 50  
221 cm) placed around the coring station and based on species or species mix estimated in  
222 accordance with Seagrass Watch flash cards (McKenzie and Yoshida, 2011). The

223 aboveground biomass, ash-free dry weight, AFDW  $\text{g/m}^2$ , from a previous study (Ismail,  
224 1993), were converted to total dry mass  $\text{t ha}^{-1}$ , with the assumption that AFDW is 80% of  
225 the total dry mass (Duarte and Chiscano, 1999). Their carbon contents were then  
226 calculated as an average of 28% C dry  $\text{wt}^{-1}$ , taken from the leaves of mixed bed meadows  
227 from the adjacent Sepanggar bay (Table S1 Supplementary Materials, along with their  
228 stable isotope of C and N ).

229 For mangroves, transect lines were laid out at randomly selected stations (~ 500 m  
230 apart) across both the Salut and Mengkabong lagoon branches (Figure 1). Transect  
231 sampling stations were placed every 25 m (50 to 100 m long), which ran perpendicular to  
232 the shoreline. Sediment cores around 50 cm long were taken with 11 cm larger diameter  
233 PVC tubes ( $n = 20 \times 2$ ). The larger diameter made core penetration easier and eliminated  
234 sediment compaction. Immediately upon extraction, the cores transported to the  
235 laboratory under ice, then and stored at  $-20^\circ\text{C}$  after sampling for dry bulk density, pore  
236 water salinity and particle size analysis. The depth approximates half the carbon stock to  
237 1 m (Chmura, Anisfeld *et al.* 2003) and was corrected accordingly. Biomass within each  
238 plot (10 m x 10 m), was taken from mangrove tree diameters, measured at chest height,  
239 DBH (> 1.3 m). The DBH measurements and wood density ( $\rho$ ) for the different species  
240 (Duke, Mackenzie *et al.* 2013; Josue and Imiyabir 2014; Kauffman and Donato 2012) are  
241 required to calculate biomass using a Southeast Asian allometric equation (Kauffman and  
242 Donato 2012) of which around half (parameter 0.5, (1) was considered as organic carbon  
243 (IPCC, 2014).

$$\text{Biomass (kg C)} = 0.251 \times \rho \times \text{DBH}^{2.46} \times 0.5 \quad (1)$$

244 The area of the mangroves forests were incorporated with secondary data from  
245 Spalding *et al.* (2010), Google Earth satellite images 2017 and our ground truth  
246 information. For seagrass meadows, areas were measured by stepping around their  
247 subtidal outer perimeter at low tide, as guided by google earth images, and positions  
248 taken every few meters with a handheld GPS. In regions that were uncomfortably muddy  
249 and deeper, a boat was used to follow close to the meadows perimeter.

250 For seagrass around 25 cm of sediment were extracted with a 5 cm diameter PVC tube  
251 ( $n = 56$ ) for sedimentary carbon stocks. The depth approximates half of the carbon stock  
252 to 1 m (Lavery *et al.*, 2013) and placed immediately under ice in a vertical position  
253 before being transported to the laboratory. In each plot, two quadrats (50 x 50 cm) were  
254 used to study seagrass coverage according to Seagrass Watch protocol (Mckenzie and  
255 Yoshida, 2011). The coverage to biomass was obtained from previous studies on seagrass  
256 biomass in Salut-Mengkabong estuary/lagoon (Ismail, 1993).

### 257 **Sediment analysis**

258 All sediment dry bulk densities were measured from the homogenised core sample sealed  
259 within its plastic storage bag a sealed plastic bag. For seagrass, this was top 25 cm, and  
260 for mangroves the surface 25 cm and deeper core sections (25-30 cm and 25-40 cm) were  
261 processed separately. A cut off 1cm<sup>3</sup> disposable syringe used in the manner of a piston  
262 core was used to measure the volume before the dry weight (Lavelle, Massoth *et al.*  
263 1985), and after corrected for dissolved salt content using a refractometer from a  
264 subsample centrifuged to isolate its pore water. Subsamples were also taken from the  
265 homogenised sediments for sediment particle size distribution. A laser diffraction  
266 (LISST-Portable XR Sequoia Scientific) with full Mie theory in its calculations was used

267 for the particle size spectrum, using a Wentworth classification from the clay/silt and  
268 sand proportions. For carbon analysis, the sediment was first shaken through 1 mm  
269 stainless steel mesh after drying (60 °C) and finally ground into fine powder (< 63 µm)  
270 with a porcelain mortar pestle. Subsamples were taken for PIC using a loss on ignition  
271 procedure (Santisteban, Mediavilla *et al.* 2004). Details of TOC and BC, as isolated by  
272 chemo-thermal oxidation (CTO) and after nitric acid oxidation can be found in Chew and  
273 Gallagher (2018). Again, all contents were reported after correction for salt content  
274 (Lavelle, Massoth and Crecelius, 1985).

### 275 **Carbon stock Analysis**

276 The carbon stock densities and of top 25 cm and 50 cm for seagrass and mangrove  
277 respectively were calculated from fraction of the average TOC content, as its dry mass,  
278 down the length of the sediment core, its average bulk density and area of coverage (2).

$$279 \text{ Sedimentary blue carbon stock, Mg C h}^{-1} = \sum \text{TOC} \times B \times A \times D \quad (2)$$

280 Where A is estimated area of coverage, B the dry bulk density, and D refers to the depth  
281 of the sediment core (Nellemann *et al.*, 2009; Lavery *et al.*, 2013; Howard *et al.*, 2014).

282 The carbon stocks for top 1 m were conservatively estimated by doubling up the storage  
283 from the 25 cm of the seagrass core (Fourqurean *et al.*, 2012), and double the sum of the  
284 average top 25 cm and bottom 25 - 50 cm of the mangrove cores.

### 285 **Statistical analysis**

286 A hierarchical random sampling design was used to estimate regional and lagoon wide  
287 mean and variance (standard error, S.E) of biomass and sedimentary stocks (Figure 1).  
288 For seagrass, scales were based on the determination of variability of independent

289 seagrass sediment coring and biomass quadrat ‘stations’ from 2 to 4 ‘site’ replicates ( $10^1$   
290 m scale) separated by the common length scale distance ( $>200$  m) within a meadow and  
291 between meadows within lagoon regions. Regions were defined ostensibly by the  
292 sediment particle sizes, which trended from sandy within the lower regions to sandy-clay  
293 (Wentworth classification) within the upper parts of the lagoon (Table S2 Supplemental  
294 Materials): Lower upper Salut across the whole of the lagoon ( $10^3$  m). Upper Salut (SU)  
295 and Mengkabong (MU), and the lower common way region that extends to the entrance,  
296 named as Salut (SL) (Figure 1). With the exception of SL seagrass region, a Nested  
297 ANOVA structure was used to estimate the means of all variables and their summed  
298 variances across the estuarine regions. The number of degrees of freedom being reduced  
299 to the number of stations and number of sites within each region. This was calculated  
300 using the statistical functions and formulas within Excel™ on appropriate organized  
301 series column variables representing station and sites. For the SL region the means for  
302 TOC, BC and POC sedimentary variables, stations were weighted by area (0.5) between  
303 the largest southern meadow’s stations (SLE) and the remaining meadows. This was done  
304 to remove regional bias in the mean by a much larger sedimentary carbon stock density  
305 within the SLE meadow (10 fold greater) over the remaining meadows within the SL  
306 region (Figure S1 Supplemental Materials). For the sedimentary seagrass TOC-BC-PIC  
307 concept, direct calculations for comparisons to the previous true TOC-BC sampling  
308 population mean was confounded by an incomplete sets of stations for corresponding PIC  
309 stocks. In other words, while each stations’ TOC-BC variables necessary values falls  
310 because of subtraction of its corresponding PIC, it will not necessarily (or likely) change  
311 in a proportional manner from different estimates of sample means incomplete station  
312 sets. To normalize bias for direct comparisons with the TOC-BC sample mean, the

313 percentage differences between means were calculated for the truncated TOC-BC-PIC  
314 stock with only its corresponding TOC-BC variables. This difference was then used to  
315 estimate a corresponding fall in the sample mean from the complete TOC-BC set to a now  
316 modelled mean of the truncated TOC-BC-PIC set. Variances for summation were then  
317 taken from the truncated set. The set was incorporated within the Nested ANOVA as  
318 variability about the new mean for the TOC-BC-PIC concepts. It could be expected that  
319 the variance of the truncated set was ostensibly equal or greater than a complete set, and  
320 thus remove any tendency towards a type one error when comparing sample mean  
321 between regions.

322 We refer the reader to Supplementary information and files for data that relate to the  
323 Figures, as well as additional tables and figures for parameters and smaller scale  
324 illustrations of stock density variance used for the weighting decisions for the Nested  
325 ANOVA.

## 326 **RESULTS**

327 The section is description of the parameters that characterize the stations within the  
328 delineated regions of the lagoon, namely the plant species, seagrass coverage, the  
329 sedimentology. The information is used to constrain any stand out similarities or  
330 difference in carbon stock density concepts within and between regions. Finally, the total  
331 organic carbon stocks of seagrass and mangrove are calculated across the lagoon. The  
332 totals are valued in relation to estimates of the indigenous community's annual incomes.

### 333 **Biological and physical parameters of seagrass and mangroves**

334 All seagrass meadows across the lagoon were subtidal, with the visibly more turbid upper  
335 Salut and Mengkabong branches supporting the largest and monospecific *Enhalus*

336 *acorooides* meadows (Figure 1). Both of these *Enhalus* sp. meadows were located near  
337 equidistant from the lagoons entrance but with discernibly greater canopy coverage for  
338 the Mengkabong meadow (Tables S3a,b Supplemental Materials). Five of 6 stations  
339 reported  $\geq 50\%$  coverage within Mengkabong with the majority of Salut meadows'  
340 stations (i.e., site replicates) reported coverages of  $\leq 50\%$ . Across the remaining lower  
341 lagoon meadows, coverage was  $> 50\%$  but with a mix of *Cymodocea* spp. and *Enhalus*  
342 *acorooides* species with an interchanging dominance. Of the mangrove canopy,  
343 *Rhizophora apiculata* was found to be the predominated tree species across the whole of  
344 Salut-Mengkabong lagoon with monospecific examples within the lagoons' upper  
345 regions. This was in contrast to lower and middle sections of the Salut branches. Here,  
346 the stands were more diverse (*Rhizophora mucronata*, *Ceriops decandra* and *Lumnitzera*  
347 *racemose*) larger and seemingly more mature.

348 Overall, the subtidal sediments across the lagoon reflected the degree of isolation from  
349 the main channel and the distance from the lagoons' marine tidal delta. The lower lagoon  
350 supported sandy sediments, but with a significantly greater clay-silt contents within the  
351 meadows at stations SLE and SLF (Figure 1) of 8.6 to 9.5% *cf* 0.9 -2.5% ( $P < 0.001$ ).  
352 For the upper Salut and Mengkabong regions, sediments ranged from sandy through to  
353 sandy clay loam as a function of distance from the marine tidal delta (Table S2  
354 Supplemental Materials).

355 [Figure 1 about here,]

### 356 **Seagrass and mangrove carbon stock densities**

357 The contribution of seagrass biomass to the TOC stock density across stations was  
358 restricted to upper region of the largest seagrass canopy and found to be insignificant and



359 well within estimated sediment TOC stock density error (Table S3a Supplemental  
360 Materials). Consequently, for clarity, seagrass biomass was not explicitly included within  
361 the assessment analysis but expressed as less than other stock contributions' lower  
362 significant figure

363 The lower Salut seagrass stock density concepts were found to be on average several  
364 times smaller than the remaining upper regions of the Salut and Mengkabong branches ( $P$   
365  $< 0.001$ ) (Figure 2a, 2b and 2c). However, the relative difference within each region  
366 between concepts was not consistent. There was a different pattern of ranking and  
367 relative differences between stock concepts (Figure 2a, 2b and 2c). The upper Salut  
368 region, serviced by a small river (Figure 1), revealed a clear and greater successive fall in  
369 the concepts' sample means over the lower Salut and upper Mengkabong regions. The  
370 differences originating from the larger BC stocks (Figure 2a, bars 2 and 4), in particular  
371 BC as isolated by CTO (Figure 2a, bar 4), and PIC stocks (Figure 2a, bars 3 and 5). This  
372 appeared to be the result of a disproportionate amount of BC, as separated by CTO  
373 (Figure 2d, bar 4) that could not spate the inclusion of photoliths within the concept  
374 (Chew and Gallagher, 2018).

375 In contrast, to seagrass, the variability of mangrove sedimentary carbon stock density  
376 concepts across regions were notably smaller, with means more than twice that of  
377 seagrass (Figure 2d, 2e and 2f) and irrespective of the differences in mangrove species  
378 (Tables S3a,b Supplemental Materials). The possibly exception was a close equivalence  
379 between  $\text{TOC-BC}_{\text{CTO}}\text{-PIC}_{\text{equiv}}$  concept between the upper and lower Salut region (Figure  
380 2d, 2f bars 5;  $P_{(\text{same})} = 0.015$ ). Unlike seagrass, the mangrove biomass held a measurably  
381 significant fraction (Figure 2d, 2e and 2f) on average 47.4%, 34.5%, and 101.25 of their  
382 sedimentary TOC stocks for the upper Salut, Mengkabong and lower Salut regions

383 respectively. The pattern also reflecting the below ground biomass contributions (Figure  
384 2d, 2e and 2f), ranging around 17.5% to 22.2% of their total biomass. Like seagrass, all  
385 carbon stock density concepts were notably greater ( $P < 0.05$ ) in the upper branches  
386 (Figure 2d and 2e) of the lagoon, although less so, than found in the lower Salut region  
387 (Figure 2f). Again, the larger fall in stock density concept services was found in the upper  
388 Salut region, the result of an apparently larger BC components, particularly as isolated by  
389 CTO (Figure 2e, bar 4).

390 [Figure 2 about here,]

### 391 **Total seagrass and mangrove carbon stocks for the lagoon**

392 The values of the traditional TOC stock concept show that most of the carbon stocks are  
393 located within mangroves (Table 1). This is in part because of the mangroves' greater  
394 carbon stock densities (Figure 2), but mainly because of the extensive, and relatively  
395 inaccessibly mangrove forest along and back from Mengkabongs' north shore (Figure 1).  
396 On average 321.1 GgC appeared to be stored within this region (calculated as the aerial  
397 fraction of its Mengkabong TOC stock;  $(681.92/750.12) \times 353.3$ , Table 1). The lagoons'  
398 remaining TOC stocks, on average 8.9% (calculated from Table 1), is located within  
399 more accessible seagrass and coastal fringe mangrove forests. Overall, this variance is  
400 reflected in the other stock concepts as seen from their similar relative stock densities  
401 (Figure 2). If we focus on the stock concept with the greatest impact on traditional TOC  
402 stock estimates (i.e.,  $\text{TOC} - \text{BC}_{\text{CTO}} - \text{PIC}_{\text{equiv}}$ ), the degree of bias in the mitigation of  
403 greenhouse gas emissions  $14.2\% \pm 0.12$  (calculated from Table 1), appear as only a  
404 moderately smaller than traditional assessments.

405 [Table 1 about here,]**Total organic carbon stocks values and the indigenous**  
406 **community income**

407 Market values of carbon stocks are uncertain and depend on the choice of regional carbon  
408 credit market. Whether it is amenable or easily available, there is also uncertainty in any  
409 assessments on future price projections (Lavery *et al.*, 2013; Siikamaki *et al.*, 2013;  
410 Zarate-Barrera and Maldonado, 2015). For this study, we have chosen conservative  
411 estimates based on volunteer markets, currently 0.1– 0.02% of the value and volume of  
412 the regulated global carbon market. These are more flexible and known to fund micro-  
413 projects accessible to communities. Micro-projects are set at around US \$10 per tonne of  
414 CO<sub>2equiv</sub> (Peters-Stanley and Yin, 2013), but more commonly around US \$6 per tonne of  
415 (Ullman, Bilbao-Bastida and Grimsditch, 2013). Converting carbon stocks to CO<sub>2equiv</sub>,  
416 results in total blue carbon stock credits traded at 1405.44 ± 116.93 GgC, and valued  
417 around 8.43 million US\$. This one time scalar quantity can be transformed to average  
418 annual incomes as 0.44 million US\$ y<sup>-1</sup> over 20 years. The estimate assumes that, in  
419 general, the loss of stocks over this time period has likely reached equilibrium where 96 %  
420 of the carbon has been lost to the atmosphere (IPCC, 2014). When this estimate is  
421 corrected, for what we consider, as the most conservative carbon stock concept (TOC-  
422 BC<sub>CTO</sub>-PIC), both stocks and subsequent income would be only reduced by a moderate  
423 14.2% across the whole lagoon. Nevertheless, for this type of lagoon, located within this  
424 Southeast Asian region, 14.2% is greater than traditional stock variability estimates (8.3%  
425 one tailed  $P < 0.05$ ). Consequently, it can still be regarded as an important source of bias  
426 if not accounted for, and a bias that becomes increasingly important in more open coastal  
427 seagrass blue carbon ecosystems of the same region (Gallagher *et al.*, 2019)

428 The household income of the lagoons' Sama–Bajau community was estimated from  
429 an older estimated annual income of 12 000 to 48 000 RM per family (Raduan et al.,  
430 2010). The estimate was corrected for 2016 purchasing power as equivalent to 3 840 to  
431 15 385 US\$ y<sup>-1</sup>. The average exchange rates between 2010 and 2016 were used after  
432 correcting for the average rate of inflation experienced by Malaysia from 2011 to 2016.  
433 ([https://www.poundsterlinglive.com/bank-of-england-spot/historical-spot-exchange-](https://www.poundsterlinglive.com/bank-of-england-spot/historical-spot-exchange-rates/usd/spots/USD-to-MYR)  
434 [rates/usd/spots/USD-to-MYR](https://www.poundsterlinglive.com/bank-of-england-spot/historical-spot-exchange-rates/usd/spots/USD-to-MYR); <https://knoema.com/atlas/Malaysia/Inflation-rate>). When  
435 scaled up to today's 480 households, taken from an interview with the Headman, the  
436 community is likely to have earned between 1.8 to 7.4 million US\$ y<sup>-1</sup>.

#### 437 **Bulk density as predictors of TOC and PIC sediment concentrations**

438 Overall, the range of TOC concentrations within seagrass sediments were greater than  
439 found in mangroves, reflecting mainly the lower organic contents contributions from the  
440 sandier sediments (Figure 3). Over these ranges, there were strong to moderate  
441 correlations from least square regressions of DBD with concentrations for TOC, within  
442 the seagrass and mangrove sediments respectively, and for PIC within seagrass sediments.  
443 In contrast PIC concentration were both invariant with DBD and relatively constant (2.7  
444 kg m<sup>-3</sup> ± 0.07)

$$445 \text{ Seagrass TOC} = \text{DBD} \times 29.82 - 45.34; \quad R^2 = 0.85; P < 0.001 \quad (3)$$

$$446 \text{ Mangrove TOC} = \text{DBD} \times 24.98 - 50.72; \quad R^2 = 0.67; P < 0.001 \quad (4)$$

$$\text{Seagrass PIC} = \text{DBD} \times 4.11 - 8.25; \quad R^2 = 0.60; P < 0.001 \quad (5)$$

445 [Figure 3 about here,]

#### 446 **DISCUSSION**

447 Across the lagoon, it was clear that both seagrass and mangroves of the lower lagoon  
448 region supported smaller sedimentary carbon stocks. Explanations likely come from two  
449 standpoints. Firstly, greater net loss of litter and allochthonous particulates than the more  
450 sheltered upper lagoon embayments (Chiu, Huang and Lin, 2013; Portillo, 2014; Ricart,  
451 Perez and Romero, 2017; Gallagher *et al.*, 2019a) The region is characterized by a  
452 typically more turbulent marine tidal delta and what it was observed as relatively fast  
453 flowing tidal flows along the narrow channel that lead towards upper part of the Salut  
454 branch (Figure 1). Secondly, it appears that in addition to allochthonous litter more than  
455 two thirds of sedimentary organic matter in seagrass sediments comes from the more  
456 extensive mangroves of the upper lagoon. It is recognised that other factors can also  
457 conceivably contribute to the variance. For seagrass, the size of the seagrass canopy, its  
458 coverage and the area of the meadow itself, are possible variants. The larger canopy  
459 species, as found in the upper lagoon, are more effective in retaining litter and  
460 contributing greater amounts to sediment deposition than the smaller faster growing  
461 species, which characterize the lower lagoon (Gallagher *et al.*, 2019b). Larger meadows,  
462 such as found in the upper lagoon, appear to retain more litter by virtue of the main body  
463 having a greater geocentric distance from the edge (Ricart, Perez and Romero, 2017).  
464 Although, there is some suggestion of possible cofounding from the larger lower lagoon  
465 meadow at site SLE (Figure 1). Here the carbon stock density was notably larger than the  
466 remaining lagoons seagrass meadows (Table S3a Supplemental materials).

#### 467 **Comparisons with other Southeast Asian traditional organic stock densities**

468 Across the western quarter of the Southeast region, the lagoon's seagrass total stock  
469 densities to 1 m of sediment are in general agreement to one another. For seagrasses of

470 Chek Jawa, Singapore, within the shelter and embayment of the Johor straits, the  
471 carbon stocks were measured at around  $138 \pm \text{se } 8.6 \text{ Mg C ha}^{-1}$  of (Phang, Chou and  
472 Friess, 2015). The island estuaries/lagoons of the Indonesian Archipelago to the  
473 immediate south of Borneo were measured at around the  $129.9 \pm \text{se } 9.6 \text{ Mg C ha}^{-1}$ , and  
474  $24 \text{ Mg C ha}^{-1}$  within the more open turbulent coastal systems of its Pacific side (Alongi *et*  
475 *al.*, 2016). It is only within the eastern sector of Southeast Asia, SE Sulawesi and SE  
476 Kalimantan (Borneo) do we find examples of notably larger carbon stock densities  
477 between  $239.2 \pm 44.9$  (to 0.5 m ) and  $214.4 \pm 48.7 \text{ MgC ha}^{-1}$  (to 1 m) (Alongi *et al.*,  
478 2016).

479 Many previous studies of mangrove carbon stock densities have reported estimates to  
480 various depths (1 to 3 m). For comparison, we normalised the reports to 1m by a simple  
481 division. Similar to that for seagrasses, we found that the western section of Southeast  
482 Asia mangrove stock densities were similar to Salut–Mengakabongs’ upper lagoon. Chek  
483 Jawa’s mangrove stock density in Singapore was measured around  $307 \pm \text{s.e. } 33 \text{ Mg C ha}^{-1}$   
484 <sup>1</sup>. The Indonesian Borneo (Kalimantan) mangrove forest recorded stock densities of  
485 around  $356.51 \pm \text{s.e. } 27.60 \text{ Mg C ha}^{-1}$ , with the Neighbouring Java mangrove stock  
486 densities were marginally lower ( $284.93 \pm \text{s.e. } 15.62 \text{ Mg C ha}^{-1}$ ) ( Donato *et al.*, 2011;  
487 Murdiyarso *et al.*, 2015; Phang, Chou and Friess, 2015; Alongi *et al.*, 2016). Like  
488 seagrass region stock density distribution noticeable greater stock densities were found in  
489 eastern sector of Southeast Asia; Sulawesi ( $759.07 \pm \text{s.e. } 116.75 \text{ Mg C ha}^{-1}$ ), Sumatra  
490 ( $542.81 \pm \text{s.e. } 15.71 \text{ Mg C ha}^{-1}$ ), and Papua ( $510.89 \pm \text{s.e. } 81.06 \text{ Mg C ha}^{-1}$ ) (Donato *et.al.*,  
491 2011; Murdiyarso *et al.*, 2015; Alongi *et al.*, 2016). Many of these mangrove ecosystems  
492 are located in more complex environs. Sulawesi mangroves grow nearby degrading coral  
493 reef, the result of eutrophication from high intensity farming activities (Alongi *et al.*,

494 2016). Indeed, additional supplies of inorganic nitrogen may not only add to the biomass  
495 and sedimentary stocks through an increase productivity and leaf fall in these generally  
496 nitrogen limit systems, but add to sedimentary stocks through slow rates of soil organic  
497 mineralisation with increasing inorganic nitrogen supply (Fog, 1988). Other possible  
498 factors that distinguish this eastern sector are mangrove forests located next to a source of  
499 high carbon particulate runoff from freshwater peat swamp forests. However, unlike the  
500 mangroves of the region, the position of seagrass meadows are not ideally placed for  
501 trapping organic matter from freshwater peat swamps. Nor do seagrass productivity, in  
502 general, respond well to excessive eutrophication or turbidity (van der Heide *et al.*, 2011).  
503 Nevertheless, moderate supplies of nutrients are capable of stimulating seagrass  
504 productivity particularly in acidic waters may stimulate seagrass productivity (Ravaglioli  
505 *et al.*, 2017). In actual fact, these are the conditions seen within the eastern sectors of this  
506 archipelago where the Indonesian flowthrough nutrient upwelling dominates (Ayers *et al.*,  
507 2014). Here the origin of the deeper pacific equatorial current, rich in dissolved CO<sub>2</sub> and  
508 nutrients, has a 30 cm pressure head over the Indian Ocean. This creates a major flow  
509 through in the eastern islands on the Sunda Plate (Wyrtki, 1987). In addition flows stream  
510 past Northeast Borneo from the China Sea. Together, continual supply of rich pacific  
511 equatorial water into the area in general, and with it substantial tidal exchange into  
512 estuaries and lagoons in it path. Indeed results throughout Southeast Asian region seem to  
513 reflect this (Thorhaug *et al.*, unpublished, in review).

#### 514 **Carbon stock carbon concept bias and variability**

515 The seagrass meadows of the upper Salut branch supported significant contributions of  
516 sedimentary PIC, allochthonous BC and other possible recalcitrants. However, the

517 dominance of mangroves carbon stocks across the lagoon and their associated smaller  
518 contributions from PIC across both ecosystems and BC in mangroves (Figure 2d, 2e and  
519 2f) reduced the overall carbon stock services to a significant but moderate bias (around  
520 14%). For BC factors controlling the size of its contribution across the lagoon has  
521 previous been tested by Chew and Gallagher (2018). The relatively small BC  
522 contributions to the total organic matter was in proportion to the total sedimentary  
523 organic carbon within seagrasses and relatively invariant in mangroves. The small  
524 contribution of BC as the result of relatively high rates of net productivity and deposition,  
525 and the BC delivery mechanism, dominated by soil wash out to seagrasses and the  
526 atmosphere to mangroves. For PIC, the small concentrations are in accord with the  
527 contention that for non-edaphic geological carboniferous sediments, dissolution may play  
528 a factor in moderating PIC stock densities (Saderne *et al.*, 2018).

529 The relative variability of sedimentary PIC concentrations showed similar proportional  
530 and invariant responses across seagrass and mangrove stations as BC to organic matter,  
531 as inferred from its proportional relationship with DBD. It may be that there is an  
532 overlying variability in the supply of biological calcareous tests and shells to the surface  
533 sediments, associated with the changing seagrass canopy architecture, coverage (Perry  
534 and Beavington-Penney, 2005) and biomass. Across the lagoon, these factors are, in part,  
535 covariant with differing amounts of litter retention, their clay-silt fractions and organic  
536 contents that ultimately determines the changes in DBD. How PIC concentrations remain  
537 relatively constant in mangroves while independent of DBD determined by the differing  
538 supply of edaphic clay, silts and sands is not clear. Evidently, sedimentary PIC may  
539 require a simpler supply construct other than deposition of settling particles and  
540 subsequent burial. In place, we contend that PIC concentrations, as a minor fraction,



541 become independent of DBDs' components' depositional supply when produced within a  
542 relatively constant surface bioturbation zone. In other words, the mass of detrital PIC  
543 saturated from the left overs of a burrowing benthic epifauna is a function of volume of  
544 the niche, and not its remaining mineral and organic composition. Not only within the  
545 current surface bioturbation zone but also a past memory of the bioturbation zones over  
546 depositional time.

#### 547 **Dry bulk density: A tool for carbon stock concentrations**

548 For both seagrass and mangrove [TOC] were respectively strongly and moderately  
549 inversely linearly related to DBD. Although, within the more muddy upper lagoon  
550 seagrass meadows the variance was greater. The greater amount of variance may reflect  
551 the variability in litter retention from the edge to the center of these larger meadows. As a  
552 management tool for additional measurements the correlation coefficient population  
553 confidence intervals (95%) appear to be very acceptable and well within 15% of the  
554 variability of many analytical methods (Byers, Mills and Stewart, 1978), let alone the  
555 lagoons sampling site variability. The latter variability is captured by their regressions'  
556 prediction intervals. Indeed, this could be a useful boundary to monitor changes. For  
557 examples in changes in expected range of DBD densities carried out by the local  
558 community at for various stations. Also, as part of a more considered elemental organic  
559 carbon analysis targeted at those stations. That is to say, whether the response sits within  
560 the regression prediction limits as a first order assessment of change as either natural  
561 ecosystem variability or possible anthropogenic disturbance.

#### 562 **Values of carbon stocks as a sufficient incentive for community management**

563 It was clear that conservative estimates of the lagoons' carbon stocks worth (0.44 million  
564 US\$  $y^{-1}$ ) was not sufficient to replace the income for every household of Sama-Bajau  
565 community (1.8 to 7.4 million US\$  $y^{-1}$ ). The significance of such a conservative valuation  
566 as an incentive for community management, however, may necessarily depend not on the  
567 size of population and their total income. The Sama-Bajau have an elected hierarchy that  
568 directs community sharing from allocated council grants for village community projects)  
569 as well as a sense of family income independence (Miller, 2011). The possibility of  
570 carbon trading in these circumstances then becomes not an alternative livelihood, but a  
571 way to augment income for themselves and/or benefit the whole community. Indeed the  
572 potential for both commitment and ability to conserve and monitor the lagoons' coastal  
573 canopy and take sediment samples for future DBD measurements was evident from Mr  
574 Awang. Mr Awang was our teams' boatman of the same Bajau-Sama community (see  
575 Acknowledgments), and has communicated concerns on the state and importance of the  
576 lagoons' seagrass beds for his livelihood over a number of years to our team

577

## CONCLUSIONS

578 Traditional organic carbon stock densities for both seagrasses and mangroves across the  
579 lagoon are in broad agreement with other studies carried out in the eastern sector of  
580 Southeast Asia. The only notable exception are the smaller mangrove stock densities of  
581 the lower lagoon, also reflected in its seagrass stocks, and with other seagrass examples  
582 across the coastal eastern Southeast Asian sector. Accounting for more sophisticated  
583 carbon stock concepts by excluding BC and  $PIC_{equiv}$  contributions identified only  
584 moderate bias with traditional stock concepts, when integrated across the lagoons  
585 ecosystems (on average 14.2%). The use of DBD as a predictor of TOC and PIC

586 concentrations or ecosystem parameter was found to be useful for both monitoring and  
587 potentially identifying future impacts. The conservative valuation of the lagoons' total  
588 stock, as an annual income was not sufficient to totally replace indigenous community  
589 incomes. Nevertheless, we suggest that the potential exists for the estimates of 0.44  
590 million \$US  $y^{-1}$  to be directed towards improvements in the fisher community  
591 infrastructure, funds for training, or additional income for environmentally aware fishers  
592 within the community.

### 593 **AUTHORS' CONTRIBUTIONS**

594 JBG conceived the project, led the manuscript writing and the statistical analysis. STC  
595 designed the field sampling program, carried out measurements and collections, analysed  
596 the samples, and contributed to the manuscript and statistics. JM was in part responsible  
597 for the Supplementary Materials and contributed to project supervision. AT constructed  
598 reasons behind the high blue carbon stock densities unique to Southeast Asia and the  
599 regions' information limitations. All authors read, copy-edited and approved the final  
600 manuscript.

### 601 **ACKNOWLEDGEMENTS**

602 We would like to thank the University Malaysia Sabah for providing funding under Grant  
603 SBK0239-STWN-2015. Thanks to all the volunteers includes Cheong Kai Ching, Yap  
604 Tzuen-Keat, Jason Lai Siang Kang, Lee Yin Lin, Erik Bin Naim and undergraduate  
605 students for helping out in sampling and laboratory work. Appreciation goes to our local  
606 Sama-Bajau boatman Mr Awang who shared his knowledge of Salut-Mengkabong  
607 lagoon and assisted in the sampling.

### **LITERATURE CITED**

- 608 Alongi, D.M.; Murdiyarso, D.; Fourqurean, J.W.; Kauffman, J.B.; Hutahaean, A.; Crooks,  
609 S.; Lovelock, C.E.; Howard, J.; Herr, D.; Fortes, M.; Pidgeon, E., and Wagey, T.,  
610 2016. Indonesia's blue carbon: a globally significant and vulnerable sink for  
611 seagrass and mangrove carbon. *Wetlands Ecology and Management*, 24(1), 3-13.
- 612 Ayers, J.M.; Strutton, P.G.; Coles, V.J.; Hood, R.R., and Matear, R.J., 2014. Indonesian  
613 throughflow nutrient fluxes and their potential impact on Indian Ocean productivity.  
614 *Geophysical Research Letters*, 41(14), 5060-5067.
- 615 Broecker, W.S.; Sanyal, A., and Takahashi, T., 2000. The origin of Bahamian Whittings  
616 revisited. *Geophysical Research Letters*, 27(22), 3759-3760.
- 617 Byers, S.; Mills, E. and Stewart, L.P., 1978. A comparison of methods of determining  
618 organic carbon in marine sediments, with suggestions for a standard method.  
619 *Hydrobiologia*, 58, 43-47.
- 620 Chew, S.T. and Gallagher, J.B., 2018. Accounting for black carbon lowers estimates of  
621 blue carbon storage services. *Scientific Reports*, 8(1), 2553.
- 622 Chiu, S.H.; Huang, Y.H., and Lin, H.J., 2013. Carbon budget of leaves of the tropical  
623 intertidal seagrass *Thalassia hemprichii*. *Estuarine, Coastal and Shelf Science*, 125,  
624 27-35.
- 625 Chmura, G.L.; Anisfeld, S.C.; Cahoon, D.R., and Lynch, J.C., 2003. Global carbon  
626 sequestration in tidal, saline wetland soils. *Global Biogeochemical Cycles*, 17(4),  
627 1111. doi:10.1029/2002GB001917.
- 628 Costanza, R.; de Groot, R.; Sutton, P.; van der Ploeg, S.; Anderson, S.J.; Kubiszewski, I.;  
629 Farber, S., and Turner, R.K., 2014. Changes in the global value of ecosystem  
630 services. *Global Environmental Change*, 26, 152-158.

- 631 Donato, D.C.; Kauffman, J.B.; Murdiyarso, D.; Kurnianto, S.; Stidham, M., and  
632 Kanninen, M., 2011. Mangroves among the most carbon-rich forests in the tropics.  
633 *Nature Geoscience*, 4(5), 293-297.
- 634 Duarte C.M. and Chiscano C.L., 1999. Seagrass biomass and production: a reassessment.  
635 *Aquatic Botany* 65, 159-174.
- 636 Duarte, C.M. and Krause-Jensen, D., 2017. Export from seagrass meadows contributes to  
637 marine carbon sequestration. *Frontiers in Marine Science*, 4(13).
- 638 Duke, N.C.; Mackenzie, J., and Wood, A., 2013. Preliminary assessment of biomass and  
639 carbon content of mangroves in Solomon Islands, Vanuatu, Fiji, Tonga and Samoa  
640 Centre for Tropical Water & Aquatic Ecosystem Research, No. 13/24, James Cook  
641 University, Townsville.
- 642 Eong, O.J., 1993. Mangroves - a carbon source and sink. *Chemosphere*, 27(6), 1097-1107.
- 643 Fog, K., 1988. The effect of added nitrogen on the rate of decomposition of organic  
644 matter. *Biological Reviews*, 63(3), 433-462.
- 645 Fourqurean JW, Duarte CM, Kennedy H, et al. (2012) Seagrass ecosystems as a globally  
646 significant carbon stock. *Nature Geoscience* 5(7), 505-509.
- 647 Gallagher, J.B., 2015. The implications of global climate change and aquaculture on blue  
648 carbon sequestration and storage within submerged aquatic ecosystems. *In*:  
649 Mustafa, S. and Shapawi, R. (eds.), *Aquaculture Ecosystems: Adaptability and*  
650 *Sustainability*. Oxford: Wiley Blackwell, pp. 243-280.
- 651 Gallagher, J.B., 2017. Taking stock of mangrove and seagrass blue carbon ecosystems: A  
652 perspective for future carbon trading. *Borneo Journal of Marine Science and*  
653 *Aquaculture*, 1(1), 71-74.

- 654 Gallagher, J.B.; Chuan, C. H.; Yap, T.K., and Fredelina Dona W.F., 2019. Carbon stocks  
655 of coastal seagrass in Southeast Asia may be far lower than anticipated when  
656 accounting for black carbon. *Biology Letters*, 15(5), 20180745.
- 657 Hejnowicz, A.P.; Kennedy, H.; Rudd, M.A., and Huxham, M.R., 2015. Harnessing the  
658 climate mitigation, conservation and poverty alleviation potential of seagrasses:  
659 prospects for developing blue carbon initiatives and payment for ecosystem service  
660 programmes. *Frontiers in Marine Science*, 2(32). doi: 10.3389/fmars.2015.00032
- 661 Hoque MA, Ahad BG and Saleh E., 2010. Hydrodynamics and suspended sediment  
662 transport at tidal inlets of Salut Mengkabong Lagoon, Sabah, Malaysia.  
663 *International Journal of Sediment Research* 25, 399-410.
- 664 Howard, J.L.; Creed, J.C.; Aguiar, M.V.P., and Fouquerean, J.W., 2017. CO<sub>2</sub> released by  
665 carbonate sediment production in some coastal areas may offset the benefits of  
666 seagrass “Blue Carbon” storage. *Limnology and Oceanography*, 63(1), 160-172.
- 667 IPCC., 2014. IPCC 2013 Supplement to the 2006 IPCC Guidelines for National  
668 Greenhouse Gas Inventories: Wetlands. IPCC, Switzerland.
- 669 Ismail N., 1993). Preliminary study of the seagrass flora of Sabah, Malaysia. *Pertanika*  
670 *Journal of Tropical Agricultural Science* 16 (2), 111-118.
- 671 Jarvio, N.; Henriksson, P.J.G., and Guinee, J.B., 2018. Including GHG emissions from  
672 mangrove forests LULUC in LCA: a case study on shrimp farming in the Mekong  
673 Delta, Vietnam. *The International Journal of Life Cycle Assessment*, 23(5), 1078-  
674 1090.
- 675 Josue, J. and Imiyabir, Z., 2014. Mangrove timber - potential as flooring material. The  
676 17th Malaysian Forestry Conference, 2014, Magellan Sutura Harbour, Kota  
677 Kinabalu, Sabah, Sabah Forest Department.

- 678 Kauffman, J. and Donato, D., 2012. Protocols for the measurement, monitoring and  
679 reporting of structure, biomass and carbon stocks in mangrove forests. Center for  
680 International Forestry, No. 86, Bogor, Indonesia.
- 681 Lavelle, J.W.; Massoth, G.J., and Crecelius, A.E., 1985. Sedimentation rates in Puget  
682 sound from  $^{210}\text{Pb}$  measurements. Pacific Marine Research Laboratory, Sequim.
- 683 Lavery, P.S.; Mateo, M.A.; Serrano, O., and Rozaimi, M., 2013. Variability in the carbon  
684 storage of seagrass habitats and its implications for global estimates of blue carbon  
685 ecosystem service. *PLOS ONE*, **8**(9), e73748.
- 686 Maher, D.T.; Call, M.; Santos, I.R., and Sanders, C.J., 2018. Beyond burial: lateral  
687 exchange is a significant atmospheric carbon sink in mangrove forests. *Biology*  
688 *Letters*, 14(7).
- 689 Martay, B. and Pearce-Higgins, J.W., 2018. Using data from schools to model variation  
690 in soil invertebrates across the UK: The importance of weather, climate, season and  
691 habitat. *Pedobiologia*, 67, 1-9.
- 692 Mayer, L.M., 1994. Surface area control of organic carbon accumulation in continental  
693 shelf sediments. *Geochimica et Cosmochimica Acta*, 58(4), 1271-1284.
- 694 McKenzie, L.J. and Yoshida, R.L., 2011. Seagrass-Watch: Proceedings of a workshop  
695 for monitoring seagrass habitats in the Kimberley region, Western Australia.  
696 Department of Environment & Conservation - West Kimberley Office, Broome.
- 697 Miller, M.T., 2011. Social organization of the west coast Bajau. In SIL Electronic  
698 Working Papers 2011-009, Anthropology.
- 699 Murdiyarso, D.; Purbopuspito, J.; Kauffman, J.B.; Warren, M.W.; Sasmito, S.D.; Donato,  
700 D.C.; Manuri, S.; Krisnawati, H.; Taberima, S., and Kurnianto, S., 2015. The

- 701 potential of Indonesian mangrove forests for global climate change mitigation.  
702 *Nature Climate Change*, 5, 1089.
- 703 Nellemann, C.; Corcoran, E.; Duarte, C. M.; Valdes, L.; De Young, C.; Fonseca, L., and  
704 Grimsditch, G., (eds). 2009. Blue Carbon. A Rapid Response Assessment. United  
705 Nations Environment Programme, GRID-Arendal, [www.grida.no](http://www.grida.no).
- 706 Pendleton, L.; Donato, D.C.; Murray, B.C.; Crooks, S.; Jenkins, W.A.; Sifleet, S.; Craft,  
707 C.; Fourqurean, J.W.; Kauffman, J.B.; Marba, N.; Megonigal, P.; Pidgeon, E.; Herr,  
708 D.; Gordon, D., and Baldera, A., 2012. Estimating global "blue carbon" emissions  
709 from conversion and degradation of vegetated coastal ecosystems. *PLOS ONE*,  
710 7(9).
- 711 Permadi, D.A.; Kim Oanh, N.T., and Vautard, R., 2018. Integrated emission inventory  
712 and modeling to assess distribution of particulate matter mass and black carbon  
713 composition in Southeast Asia. *Atmospheric Chemistry and Physics*, 18(4), 2725-  
714 2747.
- 715 Perry, C.T. and Beavington-Penney, S.J., 2005. Epiphytic calcium carbonate production  
716 and facies development within sub-tropical seagrass beds, Inhaca Island,  
717 Mozambique. *Sedimentary Geology*, 174(3-4), 161-176.
- 718 Peters-Stanley, M. and Yin, D., 2013. Manoeuvring the mosaic. State of the voluntary  
719 carbon markets 2013. Washington, DC.
- 720 Phang, V.X.H.; Chou, L.M., and Friess, D.A., 2015. Ecosystem carbon stocks across a  
721 tropical intertidal habitat mosaic of mangrove forest, seagrass meadow, mudflat and  
722 sandbar. *Earth Surface Processes and Landforms*, 40(10), 1387-1400.



- 723 Portillo, E., 2014. Relation between the type of wave exposure and seagrass losses  
724 (*Cymodocea nodosa*) in the south of Gran Canaria (Canary Islands, Spain).  
725 *Oceanological and Hydrobiological Studies*, 43(1), 29-40.
- 726 Raduan, M.; Ariff, M.; Subramaniam, T.; Raduan, S.M.; Hussin, H., and Jong, K.H.,  
727 2010. Bajau women as key workforce in artisanal fishing household in Kampung  
728 Mengkabong, Tuaran, Sabah. *Journal of Maritime Geopolitics and Culture*, 1(1), 1-  
729 17.
- 730 Ravaglioli, C.; Lauritano, C.; Buia, M.C.; Balestri, E.; Capocchi, A.; Fontanini, D.; Pardi,  
731 G.; Tamburello, L.; Procaccini, G., and Bulleri, F., 2017. Nutrient loading fosters  
732 seagrass productivity under ocean acidification. *Scientific Reports*, 7(1), 13732.
- 733 Repetto, R., 2013. Cap and trade contains global warming better than a carbon tax.  
734 *Challenge*, 56(5), 31-61.
- 735 Ricart, A.M.; Perez, M. and Romero, J., 2017. Landscape configuration modulates carbon  
736 storage in seagrass sediments. *Estuarine, Coastal and Shelf Science*, 185, 69-76.
- 737 Saderne, V.; Cusack, M.; Almahasheer, H.; Serrano, O.; Masqué, P.; Arias-Ortiz, A.;  
738 Krishnakumar, P.K.; Rabaoui, L.; Qurban, M.A., and Duarte, C.M., 2018.  
739 Accumulation of carbonates contributes to coastal vegetated ecosystems keeping  
740 pace with sea level rise in an Arid Region (Arabian Peninsular). *Journal of*  
741 *Geophysical Research: Biogeosciences*, 123(5), 1498-1510.
- 742 Santisteban, J.I.; Mediavilla, R.; Lopez-Pamo, E.; Dabrio, C.J.; Zapata, M.B.R.; Garcia,  
743 M.J.G.; Castano, S., and Martinez-Alfaro, P.E., 2004. Loss on ignition: a  
744 qualitative or quantitative method for organic matter and carbonate mineral content  
745 in sediments? *Journal of Paleolimnology*, 32(3), 287-299.

- 746 Siikamaki, J.; Sanchirico, J.N.; Jardine, S.; McLaughlin, D., and Morris, D., 2013. Blue  
747 carbon: coastal ecosystems, their carbon storage, and potential for reducing  
748 emissions. *Environment: Science and Policy for Sustainable Development*, 55(6),  
749 14-29.
- 750 Sondi, I. and Juracic, M., 2010. Whiting events and the formation of aragonite in  
751 Mediterranean Karstic Marine Lakes: new evidence on its biologically induced  
752 inorganic origin. *Sedimentology*, 57(1), 85-95.
- 753 Sophia, C.J. and Robie, W.M., 2016. Geoengineering with seagrasses: is credit due where  
754 credit is given? *Environmental Research Letters*, 11(11), 113001.
- 755 Spalding, M., Kainuma, M., & Collins, L. 2010. Data layer from the World Atlas of  
756 mangroves. In Supplement to: World Atlas of mangroves: A collaborative project  
757 of ITTO, ISME, FAO, UNESCO-MAB, UNEP-WCMC, UNU-INWEH and TNC.  
758 UN EP World Conservation Monitoring Centre. [http:](http://data.unepwcmc.org/datasets/22)  
759 [data.unepwcmc.org/datasets/22](http://data.unepwcmc.org/datasets/22)
- 760 Thorhaug, A.; Poulos, H.M.; López-Portillo, J.; Ku, T.C.W., and Berlyn, G.P., 2017.  
761 Seagrass blue carbon dynamics in the Gulf of Mexico: Stocks, losses from  
762 anthropogenic disturbance, and gains through seagrass restoration. *Science of The*  
763 *Total Environment*, 605-606, 626-636.
- 764 Tolhurst, T.J.; Underwood, A.J.; Perkins, R.G., and Chapman, M.G., 2005. Content  
765 versus concentration: Effects of units on measuring the biogeochemical properties  
766 of soft sediments. *Estuarine Coastal and Shelf Science*, 63(4), 665-673.
- 767 Ullman, R.; Bilbao-Bastida, V., and Grimsditch, G., 2013. Including blue carbon in  
768 climate market mechanisms. *Ocean & Coastal Management*, 83, 15-18.

- 769 van der Heide, T.; van Nes, E.H.; van Katwijk, M.M.; Olf, H., and Smolders, A.J.P.,  
770 2011. Positive feedbacks in seagrass ecosystems - evidence from large-scale  
771 empirical data. *PLOS ONE*, 6(1), e16504.
- 772 Volker, K. and Matthias, W., 2002. Energy budget and ecological role of mangrove  
773 epibenthos in the Caete estuary, North Brazil. *Marine Ecology Progress Series*, 228,  
774 119-130.
- 775 Ware, J.R.; Smith, S.V., and Reaka-Kudla, M.L., 1992. Coral reefs: sources or sinks of  
776 atmospheric CO<sub>2</sub>? *Coral Reefs*, 11(3), 127-130.
- 777 Warren, M.W.; Kauffman, J.B.; Murdiyarso, D.; Anshari, G., Hergoualc'h, K., Kurnianto,  
778 S.; Purbopuspito, J.; Gusmayanti, E.; Afifudin, M.; Rahajoe, J.; Alhamd, L.; Limin,  
779 S., and Iswandi, A., 2012. A cost-efficient method to assess carbon stocks in  
780 tropical peat soil. *Biogeosciences*, 9(11), 4477-4485.
- 781 Wyrski K., 1987. Indonesian through flow and the associated pressure gradient. *Journal*  
782 *of Geophysical Research: Oceans* 92 (C12), 12941-12946.
- 783 Zarate-Barrera, T.G. and Maldonado, J.H., 2015. Valuing blue carbon: Carbon  
784 sequestration benefits provided by the marine protected areas in Colombia. *PLOS*  
785 *ONE*, 10(5), e0126627.
- 786

787

## LIST OF TABLES

788 Table 1. Total organic biomass and sedimentary carbon stocks within regions of the  
 789 Salut–Mengkabong lagoon (Sabah, Malaysia). Corrections have also been made for  
 790 exclusions of largest recalcitrant black carbon fraction (BC) as isolated by thermal  
 791 oxidation (CTO), and the inorganic carbon concept  $PIC_{equiv}$ . Variances represent nested  
 792 standard errors compiled across regional stations and sites. Sgr and Mgr refer to seagrass  
 793 and mangroves respectively.

| Region and ecosystem                                    | Area (ha) | TOC sediment stocks (GgC) | TOC Biomass stocks (GgC) | Total TOC stocks (GgC) |
|---------------------------------------------------------|-----------|---------------------------|--------------------------|------------------------|
| Upper Salut Sgr                                         | 23.05     | 2.87 ± 0.49               | < 0.01                   | > 2.87 ± 0.49          |
| Mengkabong Sgr                                          | 29.04     | 3.00 ± 0.55               | < 0.01                   | > 3.00 ± 0.55          |
| Lower Salut Sgr                                         | 7.39      | 0.11 ± 0.03               | < 0.01                   | > 0.11 ± 0.03          |
| Upper Salut Mgr                                         | 48.43     | 17.2 ± 1.2                | 8.15 ± 3.3               | 25.35 ± 3.51           |
| Mengkabong Mgr                                          | 750.12*   | 262.76 ± 24.1             | 90.54 ± 22.5             | 353.30 ± 32.97         |
| Lower Salut Mgr                                         | 32.52     | 5.70 ± 0.15               | 5.80 ± 2.03              | 11.50 ± 2.04           |
| Total for Sgr                                           | 59.48     | 5.98 ± 0.69               | < 0.01                   | > 5.98 ± 0.69          |
| Total for Mgr                                           | 831.07    | 285.66 ± 24.13            | 104 ± 22.83              | 390 ± 33.22            |
| Σ Total Mgr & Sgr                                       | 890.55    | 294.63 ± 24.17            | 104.50 ± 22.82           | 399.14 ± 33.20         |
| Total TOC-BC <sub>CTO</sub> - $PIC_{equiv}$ (Sgr & Mgr) | 890.55    | 237.86 ± 25.15            | 104.50 ± 22.82           | 342.36 ± 33.96         |

794 \*The area of the north shore Mengkabong mangroves (681.92 ha) is included in the stock calculations  
 795 using the southern shore mangrove stock densities as representative of the region.

796

## LIST OF FIGURES

797 **Figure 1. Mangrove and seagrass sampling stations.** The stations are centered between  
798 replicated sampling sites and compiled across lagoonal regions. Seagrass stations within  
799 the lower and upper Salut branch are labelled, SLA, SLB, SLS, SLD, SLE and SUA,  
800 SUB, SUC, SUD, SUF respectively, and seagrass stations within the Mengkabong branch  
801 are labelled MA, MB, MC, MD, ME, MF. Mangrove stations within the lower Salut  
802 branch are labelled MSL(lower) and MSL(upper), for the upper Salut branch MSU, and  
803 for the Mengkabong MMU.

804 **Figure 2. Sediment and biomass carbon stock density concepts for seagrass (a,b,c)**  
805 **and mangroves (d,e,f).** Stocks are compiled within regions of the upper Salut (**a** and **d**)  
806 and Mengkabong branches (**b** and **e**), and the lower Salut branch (**c** and **f**). The grey bars  
807 represent each regions average sediment stock concepts calculated to 1 m depth: TOC  
808 (bar 1), TOC-BC<sub>(NAO)</sub> (bar 2), TOC-BC<sub>(CTO)</sub> (bar 3), TOC-BC<sub>(NAO)</sub>-PIC<sub>(equiv)</sub> (bar 4),  
809 TOC-BC<sub>(CTO)</sub>-PIC<sub>(equiv)</sub> (bar 5). The white bars and the contained black bars (d, e, f)  
810 represent the above below ground mangrove biomass respectively. The variance about  
811 their means are the standard errors taken from a Nested ANOVA of sites and station  
812 replicates.

813 **Figure 3. Dry bulk density relationships with sedimentary [TOC] and [PIC].** The  
814 inner and outer statistical limits represent the 95% confidence limits and 95% prediction  
815 intervals respectively about their OLS regressions.

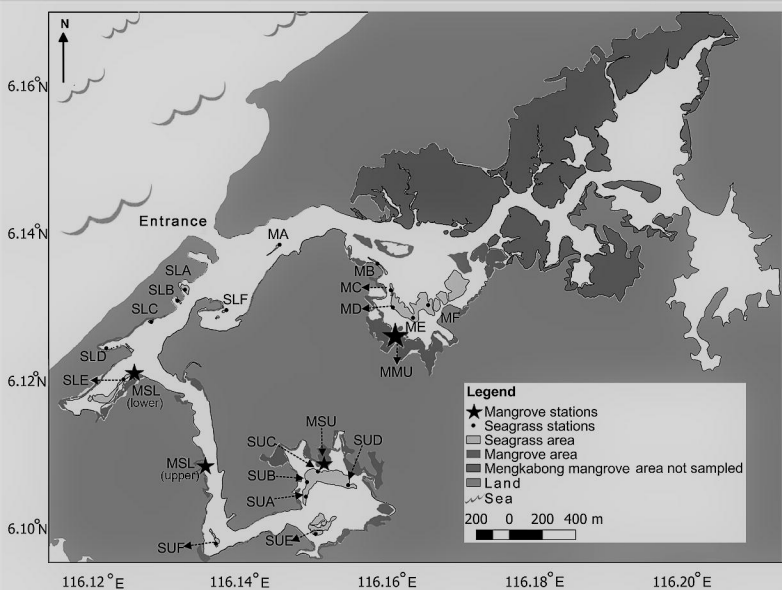

Carbon stock density (MgC ha<sup>-1</sup>)

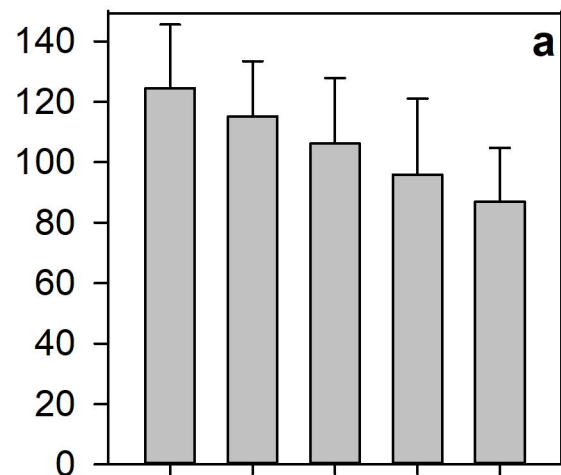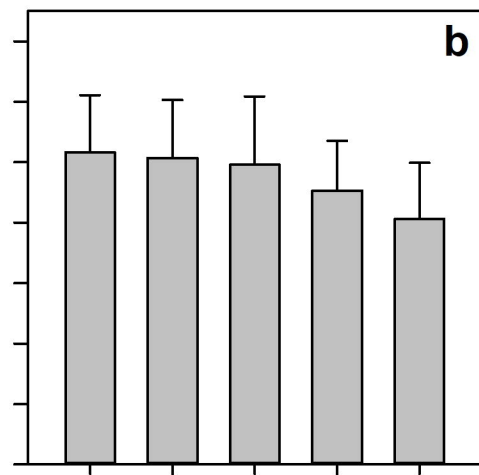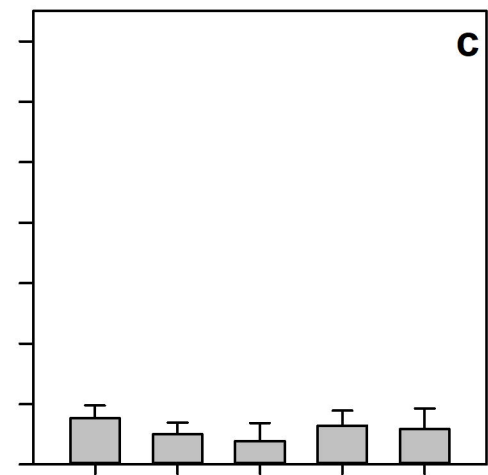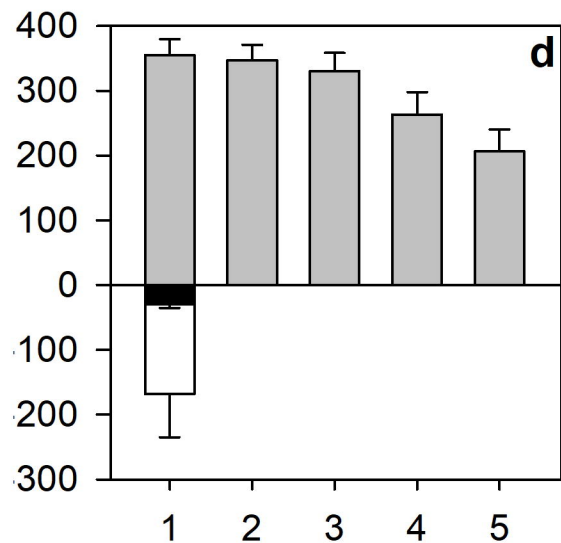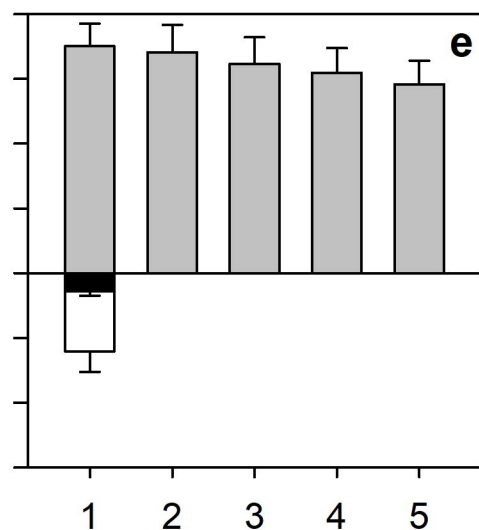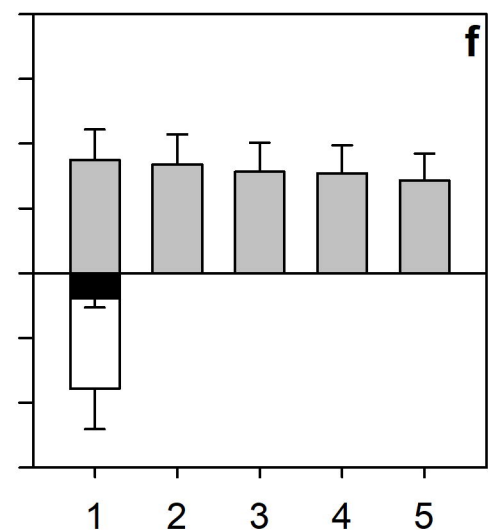

Hierarchy of carbon stock concepts (1: TOC; 2,4: TOC-BC<sub>(NAO, CTO)</sub>; 3,5: TOC-BC<sub>(NAO, CTO)</sub> - PIC<sub>equiv</sub>)

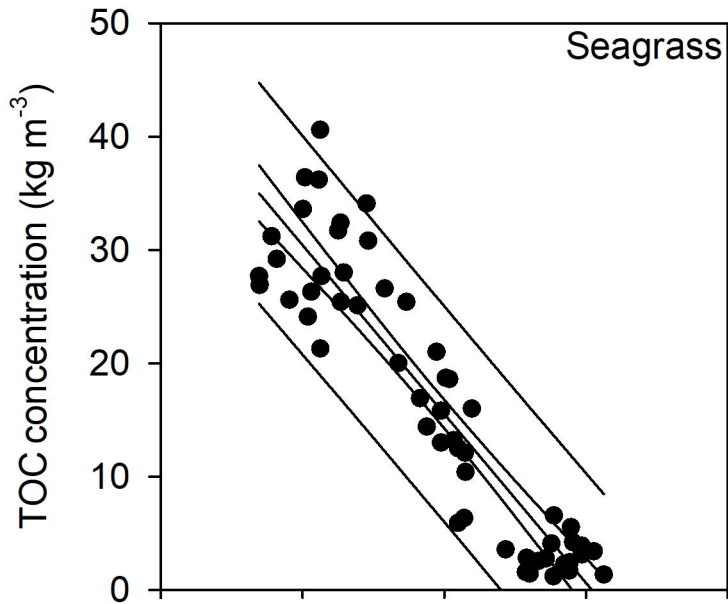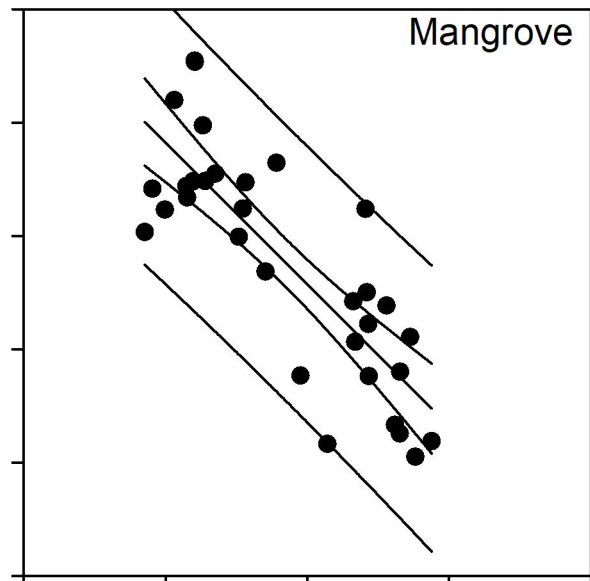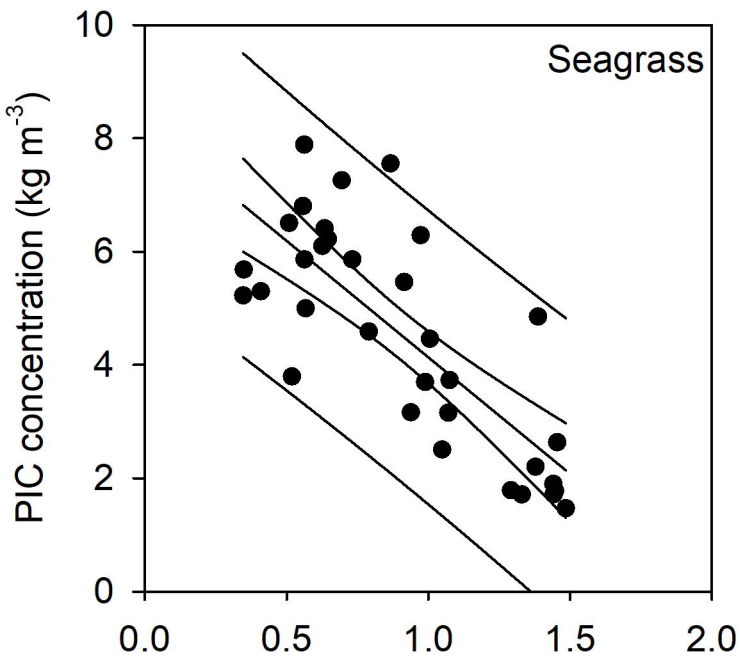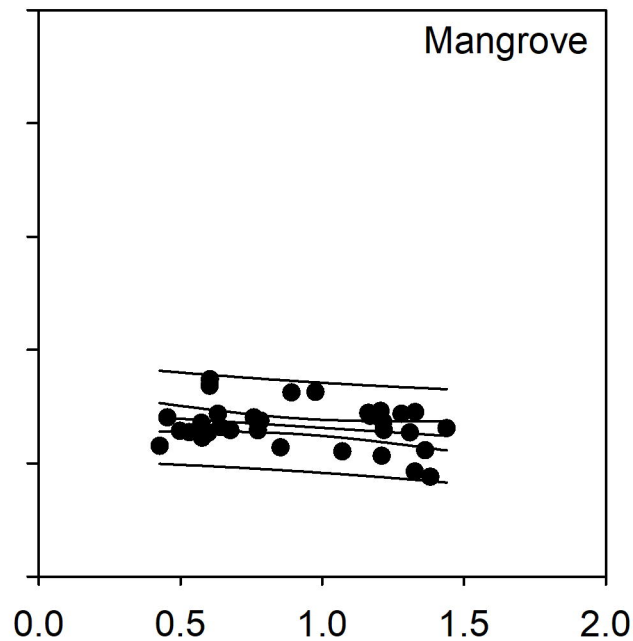

Dry bulk density ( $\text{g cm}^{-3}$ )
